# Supplementary material
Source: PubMed Central journal article supplement (PMC7657866)
Supplement: rspb20201685supp1.pdf [file rspb20201685supp1.pdf]

# Supplemental Material

Proceedings of the Royal Society B, DOI: 10.1098/rspb.2020-1685

## Upper body and ankle strategies compensate for reduced lateral stability at very slow walking speeds

Aaron N. Best<sup>1</sup>, Amy R. Wu<sup>1</sup>

<sup>1</sup>Ingenuity Labs Research Institute, Department of Mechanical and Materials Engineering, Queen's University, Kingston, ON, Canada, K7L 3N6

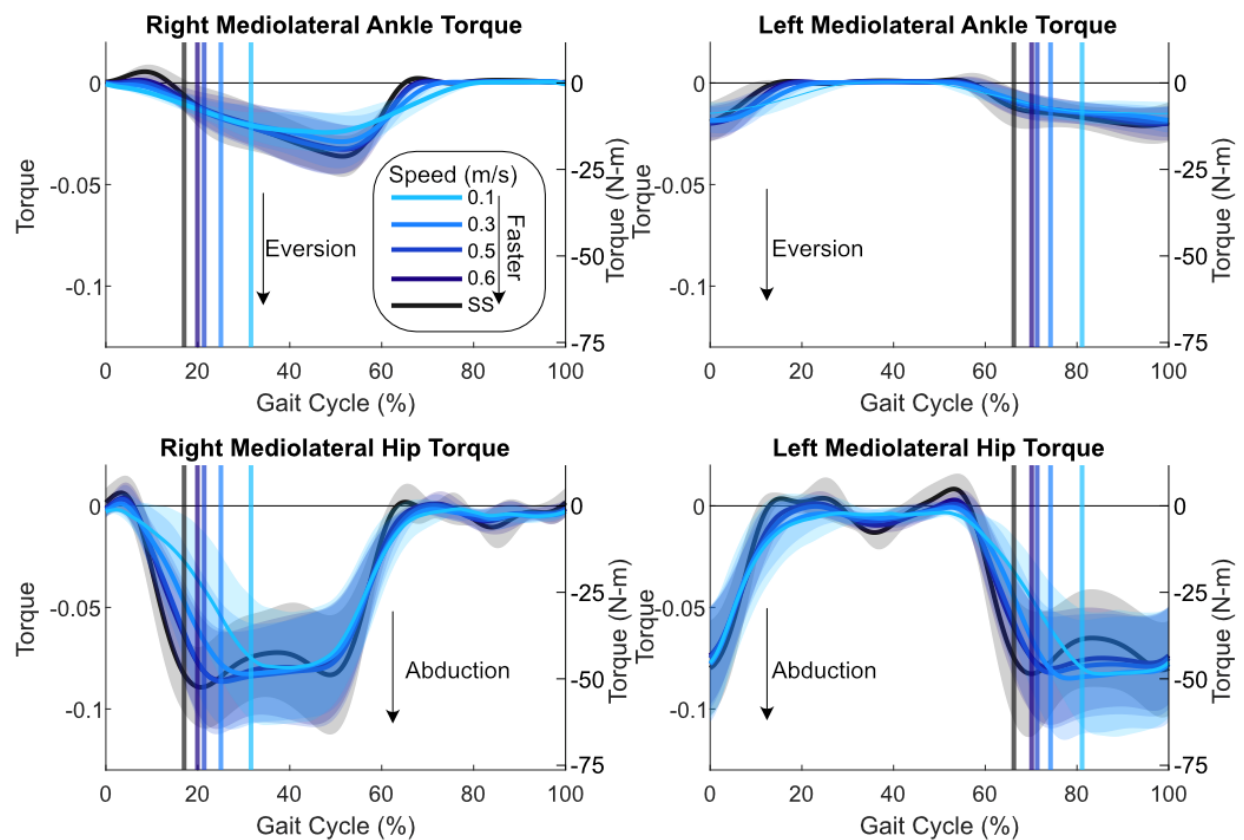

**Figure S1.** Mediolateral hip (N=6) and ankle (N=8) torques for both the right and left leg, which have both been segmented at the right heel strike event. Solid lines represent the average waveform across all available strides, shading represents 1 s.d. of the waveform, and the vertical lines represent the average location of the minimum MoS event for the respective leg. The values reported on left axes are the normalized torques and the values displayed on the right axes are the torques with SI units.
